# Supplementary material
Source: PubMed Central journal article supplement (PMC5156578)
Supplement: NIHMS820355-supplement-Table_S1.pdf [file NIHMS820355-supplement-Table_S1.pdf]

|                           | High Hydrated (HiH)<br>(USG < 1.015) | Low Hydrated (LoH)<br>(USG ≥ 1.015) |
|---------------------------|--------------------------------------|-------------------------------------|
| 0 times                   | 2 (11.11%)                           | 1 (3.13%)                           |
| 1 time                    | 2 (11.11%)                           | 4 (12.5%)                           |
| 2 times                   | 5 (27.78%)                           | 7 (21.88%)                          |
| 3 or more times per night | 9 (50%)                              | 20 (62.5%)                          |

Table S1: Nocturnal Bathroom Events by Hydration State ( $p = 0.63$ )
