# Supplementary material
Source: PubMed Central journal article supplement (PMC5156578)
Supplement: NIHMS820355-supplement-Table_S2.pdf [file NIHMS820355-supplement-Table_S2.pdf]

|                | Minimal dysfunction | Moderate dysfunction | Severe dysfunction |
|----------------|---------------------|----------------------|--------------------|
| High Hydration | 11 (61.11%)         | 5 (27.8%)            | 2 (11.11%)         |
| Low Hydration  | 16 (51.61%)         | 14 (45.16%)          | 1 (3.23%)          |

Table S2: Performance Scale: Bladder and Bowel Function by Hydration Status ( $p = 0.60$ )
